# Supplementary material for: Reaching the Maximal Unquenched Orbital Angular Momentum L = 3 in Mononuclear Transition-Metal Complexes: Where, When and How?
Source: MDPI journal article supplement (doi:10.3390/inorganics10120227), 2022-11-27
Supplement: s1 [file s1]

Archive with 1 entries (1 files):
- inorganics-2027546-supplementary.pdf
