# Supplementary material for: Reaching the Maximal Unquenched Orbital Angular Momentum L = 3 in Mononuclear Transition-Metal Complexes: Where, When and How?
Source: MDPI journal article supplement (doi:10.3390/inorganics10120227), 2022-11-27
Supplement: s1 [file s1 › inorganics-2027546-supplementary.pdf]

## Supplementary Materials

# Reaching the maximal unquenched orbital angular momentum $L = 3$ in mononuclear transition-metal complexes: where, when, and how?

Vladimir S. Mironov <sup>1,2,\*</sup>

<sup>1</sup> Shubnikov Institute of Crystallography of Federal Scientific Research Centre "Crystallography and Photonics" of Russian Academy of Sciences, Leninskiy Prospekt 59, 119333, Moscow, Russia

<sup>2</sup> Institute of Problems of Chemical Physics, IPCP RAS, Chernogolovka 142432, Russia.

\* Correspondence: [mirsal@list.ru](mailto:mirsal@list.ru)

## THEORETICAL CALCULATIONS

### Ligand-field (LF) and angular-overlap model (AOM) calculations

Ligand-field (LF) calculations for the  $3d^2$ ,  $3d^3$ ,  $3d^7$  and  $3d^8$  complexes are performed in terms of a model Hamiltonian

$$H = \sum_{i>j} \frac{e^2}{|\mathbf{r}_i - \mathbf{r}_j|} + \zeta_{3d} \sum_i \mathbf{L}_i \mathbf{S}_i + V_{LF}, \quad (\text{S1})$$

in which the first term represents Coulomb repulsion between 3d electron (where  $i$  and  $j$  numerate 3d electrons of the metal ion in the complex), the second term is the spin-orbit coupling (SOC) of 3d electrons and  $V_{LF}$  is a ligand-field Hamiltonian. The Coulomb repulsion energy is treated in terms of Racah parameters  $B$  and  $C$ . The one-electron operator  $V_{LF}$  of the LF potential is specified by a symmetric  $5 \times 5$  matrix with real matrix elements  $\langle m | V_{LF} | n \rangle$  on the basis set of d-orbitals  $xy$ ,  $x^2-y^2$ ,  $z^2$ ,  $xz$ ,  $yz$ . In the case of axially symmetric 3d-complexes, this matrix is diagonal and its matrix elements are quantified by two independent energy parameters  $E$  and  $\Delta$ , where  $E + \Delta$  is the energy of the upper 3d orbital and  $\Delta = \pm(E(xy, x^2-y^2) - E(xz, yz))$  is the energy difference between the  $(xy, x^2-y^2)$  and  $(xz, yz)$  doubly generate orbitals (see the inset in Figures 2, 3a, 5 and 6). LF calculations are performed with fixed energy  $E(z^2) = 10000 \text{ cm}^{-1}$  ( $3d^2$  and  $3d^7$  ions) and  $E(xz, yz) = 5000 \text{ cm}^{-1}$  ( $3d^3$  and  $3d^8$  ions) and variable  $\Delta$ . The employed sets of atomic parameters ( $B$ ,  $C$ ,  $\zeta_{3d}$ ) are  $B = 600$ ,  $C = 2900$ ,  $\zeta_{3d} = 150 \text{ cm}^{-1}$  for  $3d^2$  ions,  $B = 650$ ,  $C = 3000$ ,  $\zeta_{3d} = 250 \text{ cm}^{-1}$  for  $3d^3$  ions,  $B = 750$ ,  $C = 3800$  and  $\zeta_{3d} = 480 \text{ cm}^{-1}$  for  $3d^7$  ions and  $B = 800$ ,  $C = 3200$  and  $\zeta_{3d} = 600 \text{ cm}^{-1}$  for  $3d^8$  ions. LF calculations are performed with the full basis set of  $3d^N$  configurations involving 45 ( $3d^2$ ,  $3d^8$ ) and 120 ( $3d^3$ ,  $3d^7$ )  $|LM_L S M_S\rangle$  microstates. This LF computational approach was implemented in a computer code written by V.S. Mironov and then used to analyze the magnetic properties of transition metal complexes (see e.g., [49–51]).

LF calculations for the trigonal-prismatic coordination are performed with the use of the angular overlap model (AOM) outlined in ref. [46,47]. In this approach, the matrix elements  $\langle m|V_{LF}|n\rangle$  are expressed as linear combination of two AOM parameters  $e_{\sigma}$  and  $e_{\pi}$  of donor atoms involved in the coordination polyhedron. The angular dependence of these contributions to the LF term  $V_{LF}$  is analytically expressed through the spherical angles  $\theta$  and  $\varphi$ ; in the high-symmetry trigonal prismatic coordination,  $V_{LF}$  depends only on the polar angle  $\theta$ . The AOM parameters were set to  $e_{\sigma}= 9000 \text{ cm}^{-1}$  for  $\text{Cr}^{3+}$  ion and  $e_{\sigma}= 5000 \text{ cm}^{-1}$  for  $\text{Ni}^{2+}$  ion, with fixed ratio  $e_{\pi}/e_{\sigma} = 0.25$ . These values correspond to the typical total LF splitting energy for octahedral 3d complexes  $10Dq = 3e_{\sigma} - 4e_{\pi} = 2e_{\sigma}$ , with is around  $18000 \text{ cm}^{-1}$  for the trivalent  $\text{Cr}^{3+}$  ion and  $10000 \text{ cm}^{-1}$  for the divalent  $\text{Ni}^{2+}$  ion. For the specific donor atoms (O, N) these values can also be estimated from the Jorgensen's equation [48]. Results of the LF/AOM calculations for trigonal-prismatic  $\text{Cr}^{3+}$  and  $\text{Ni}^{2+}$  complexes are presented graphically in Figures 4 and 7.
